# Supplementary material for: GPER1 Activation Exerts Anti-Tumor Activity in Multiple Myeloma
Source: MDPI journal article supplement (doi:10.3390/cells12182226), 2023-09-07
Supplement: s1 [file s1]

# GPER1 activation exerts anti-tumor activity in multiple myeloma

Maria Eugenia Gallo Cantafio<sup>1</sup>, Roberta Torcasio <sup>1,3</sup>, Francesca Scionti<sup>2</sup>, Maria Mesuraca<sup>1</sup>, Domenica Ronchetti<sup>4</sup>, Mariaelena Pistoni<sup>5</sup>, Dina Bellizzi<sup>6</sup>, Giuseppe Passarino<sup>6</sup>, Eugenio Morelli<sup>7</sup>, Antonino Neri<sup>8</sup>, Giuseppe Viglietto<sup>1</sup>, and Nicola Amodio<sup>1,\*</sup>

|                  |          | IC <sub>50</sub> ±SD<br>(μM) |
|------------------|----------|------------------------------|
| MM cell lines    | AMO wt   | 0.84±0.05                    |
|                  | AMO-BZB  | 0.863±0.06                   |
|                  | AMO-CFZ  | 0.877±0.1                    |
|                  | MM1S     | 0.367±0.05                   |
|                  | MM1R     | 1.077±0.1                    |
|                  | INA6     | 0.726±0.07                   |
|                  | U266     | 0.744±0.08                   |
|                  | NCI-H929 | 0.782±0.08                   |
| MM primary cells | MM pt#1  | >2                           |
|                  | MM pt#2  | >2                           |
|                  | MM pt#3  | >2                           |

**Supplementary Table S1.** IC<sub>50</sub> values of G-1 in MM cell lines and primary cells from newly diagnosed MM patients. Cells were treated with different concentrations of G-1 for 48h, and cell viability assayed using the CTG method. IC<sub>50</sub> values were calculated using GraphPad Prism 8 software and reported as mean of three independent experiments ±SD.

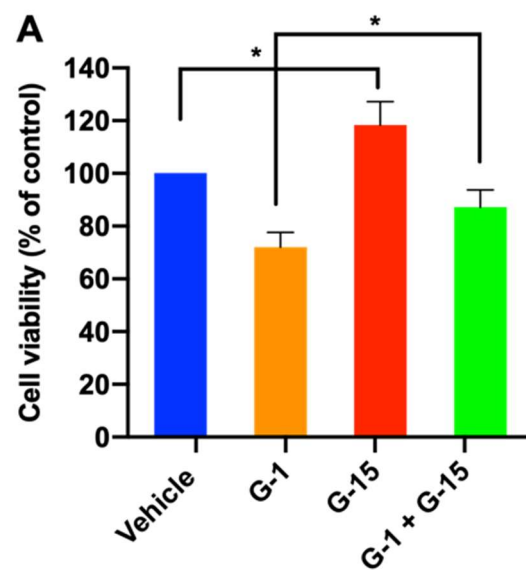

**Supplementary Figure S1.** Cell viability was assessed by CTG assay in NCI-H929 cells, 48h after 2  $\mu$ M G-1 treatment, alone or in combination with 0.5  $\mu$ M G-15. Histogram bars are representative of the percentage of viable cells compared to control. \* $p < 0.05$ .

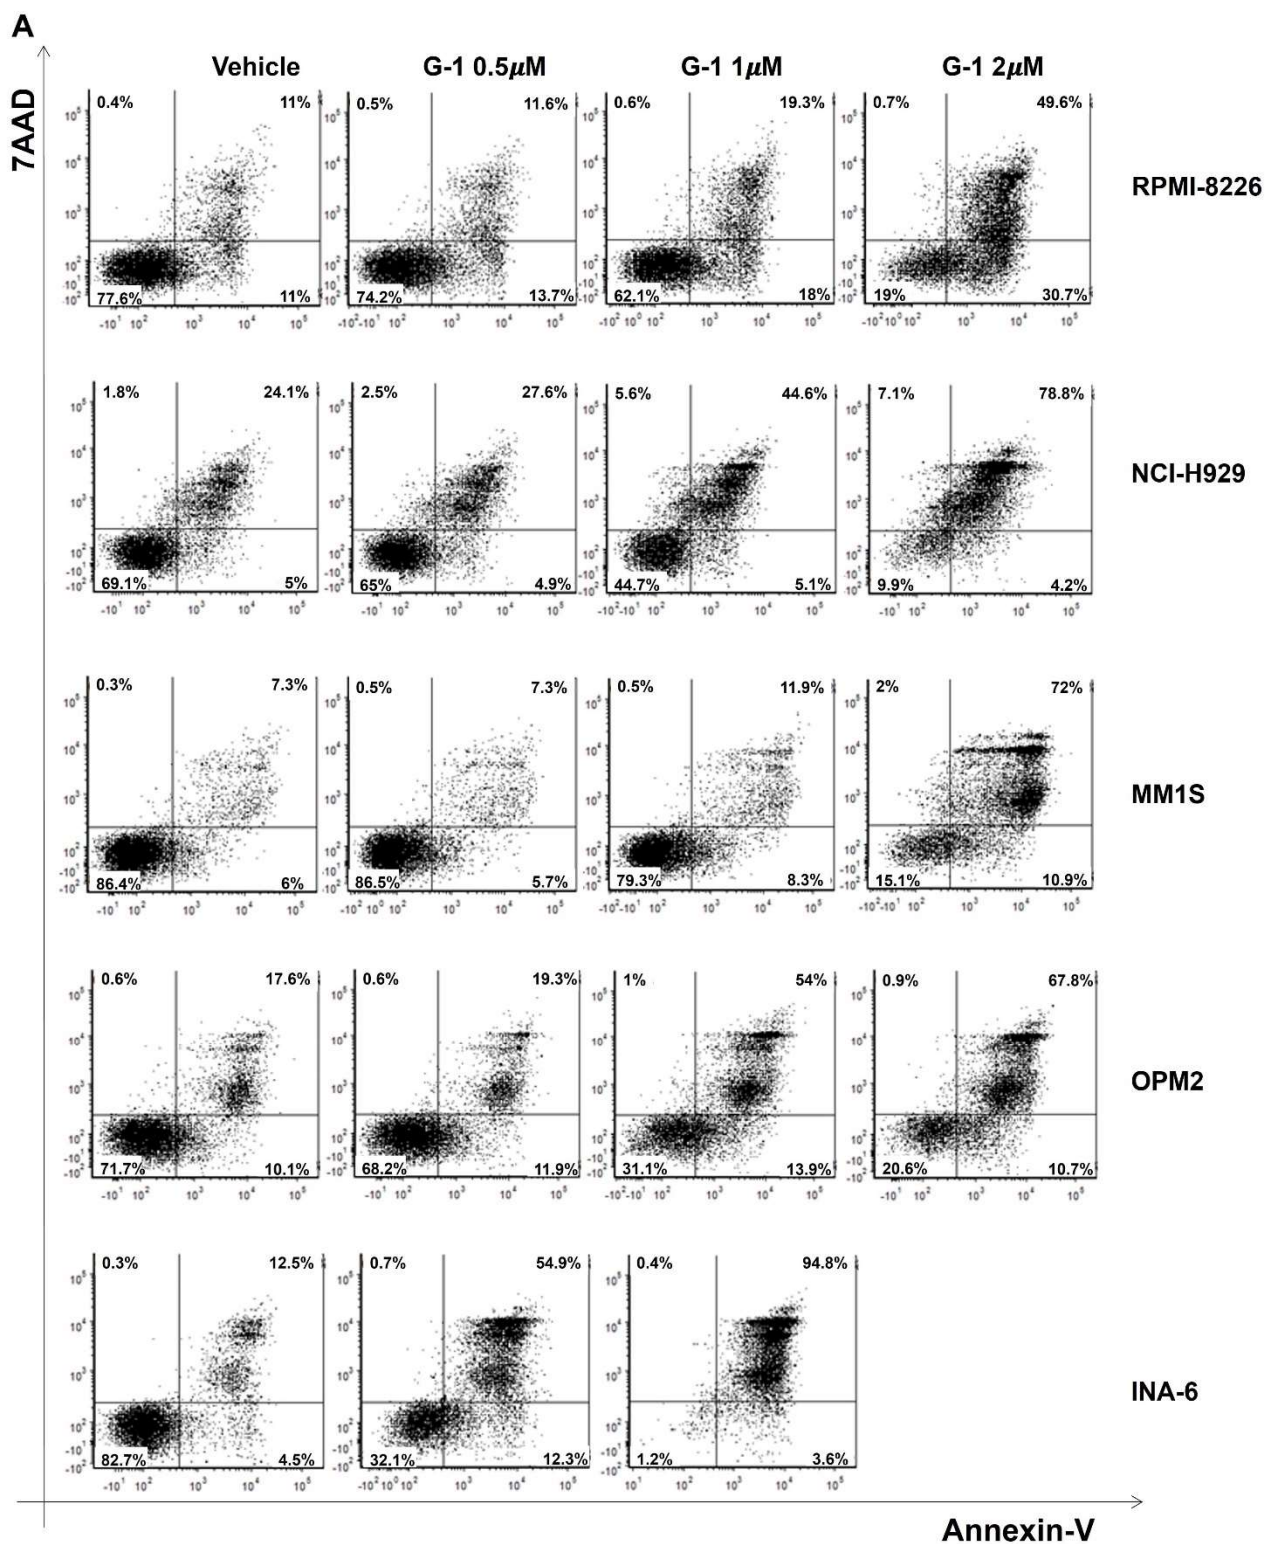

**Supplementary Figure S2.** FACS flow analysis of Annexin V/7-AAD stained RPMI-8226, NCI-H929, MM1S, OPM2 and INA-6 cells, 48h after G-1 treatment. Dot plots are representative of the percentage of apoptotic cells from an independent biological replicate (n = 3).

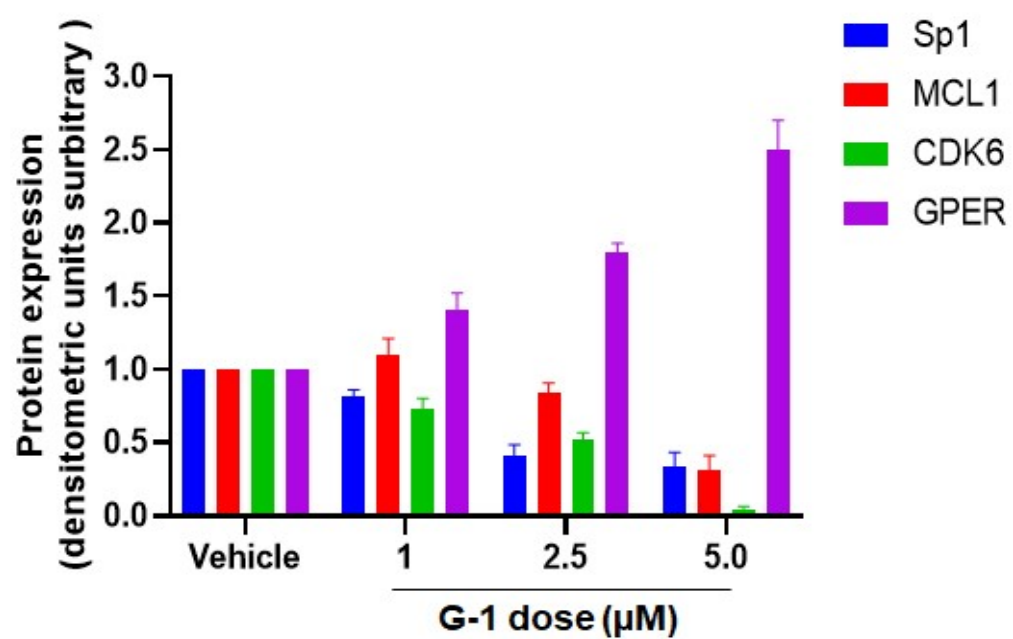

**Supplementary Figure S3.** Densitometric analysis of Sp1, MCL1, CDK6 and GPER1 protein fold change of expression in NCI-H929 cells treated for G-1 for 24h. GAPDH was used as loading control.
